# Supplementary material for: Human centromeric CENP-A chromatin is a homotypic, octameric nucleosome at all cell cycle points
Source: PubMed Central journal article supplement — J Cell Biol. 2017 Mar 6;216(3):607–21. doi: 10.1083/jcb.201608083 (PMC5350519; doi:10.1083/jcb.201608083), 2017-03-06
Supplement: JCB_201608083_sm.pdf [file JCB_201608083_sm.pdf]

Nechemia-Arbely et al., <https://doi.org/10.1083/jcb.201608083>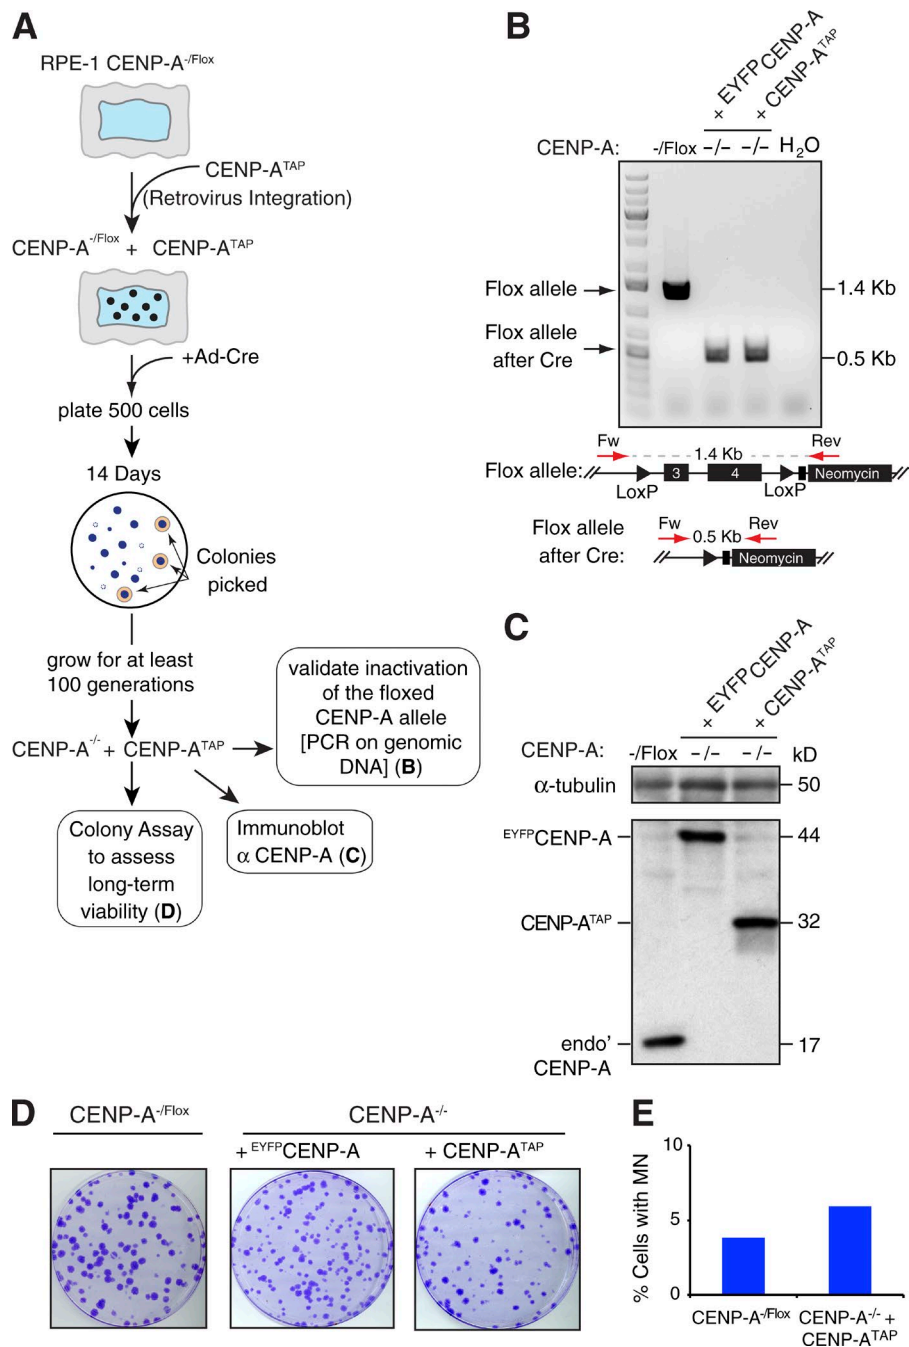

Figure S1. **CENP-A<sup>TAP</sup> maintains long-term centromere function and viability in the absence of endogenous CENP-A.** (A) Schematic of cell line construction and of the experiments in B–D. (B) PCR analysis on the DNA extracted from surviving colonies after >100 generations of growth after adeno-Cre treatment to inactivate the remaining CENP-A allele in CENP-A<sup>-/-</sup> RPE-1 cells expressing EYFP-CENP-A or CENP-A<sup>TAP</sup>. (C) Immunoblot to visualize levels of each CENP-A-tagged rescue construct or endogenous (endo') CENP-A. α-Tubulin was used as a loading control. (D) Images of representative crystal violet-stained colonies from a colony formation assay for measuring long-term viability. (E) Micronuclei (MN) quantification in CENP-A<sup>-/-</sup> RPE-1 and after adeno-Cre treatment to inactivate the remaining CENP-A allele in CENP-A<sup>-/-</sup> RPE-1 cells expressing CENP-A<sup>TAP</sup>.

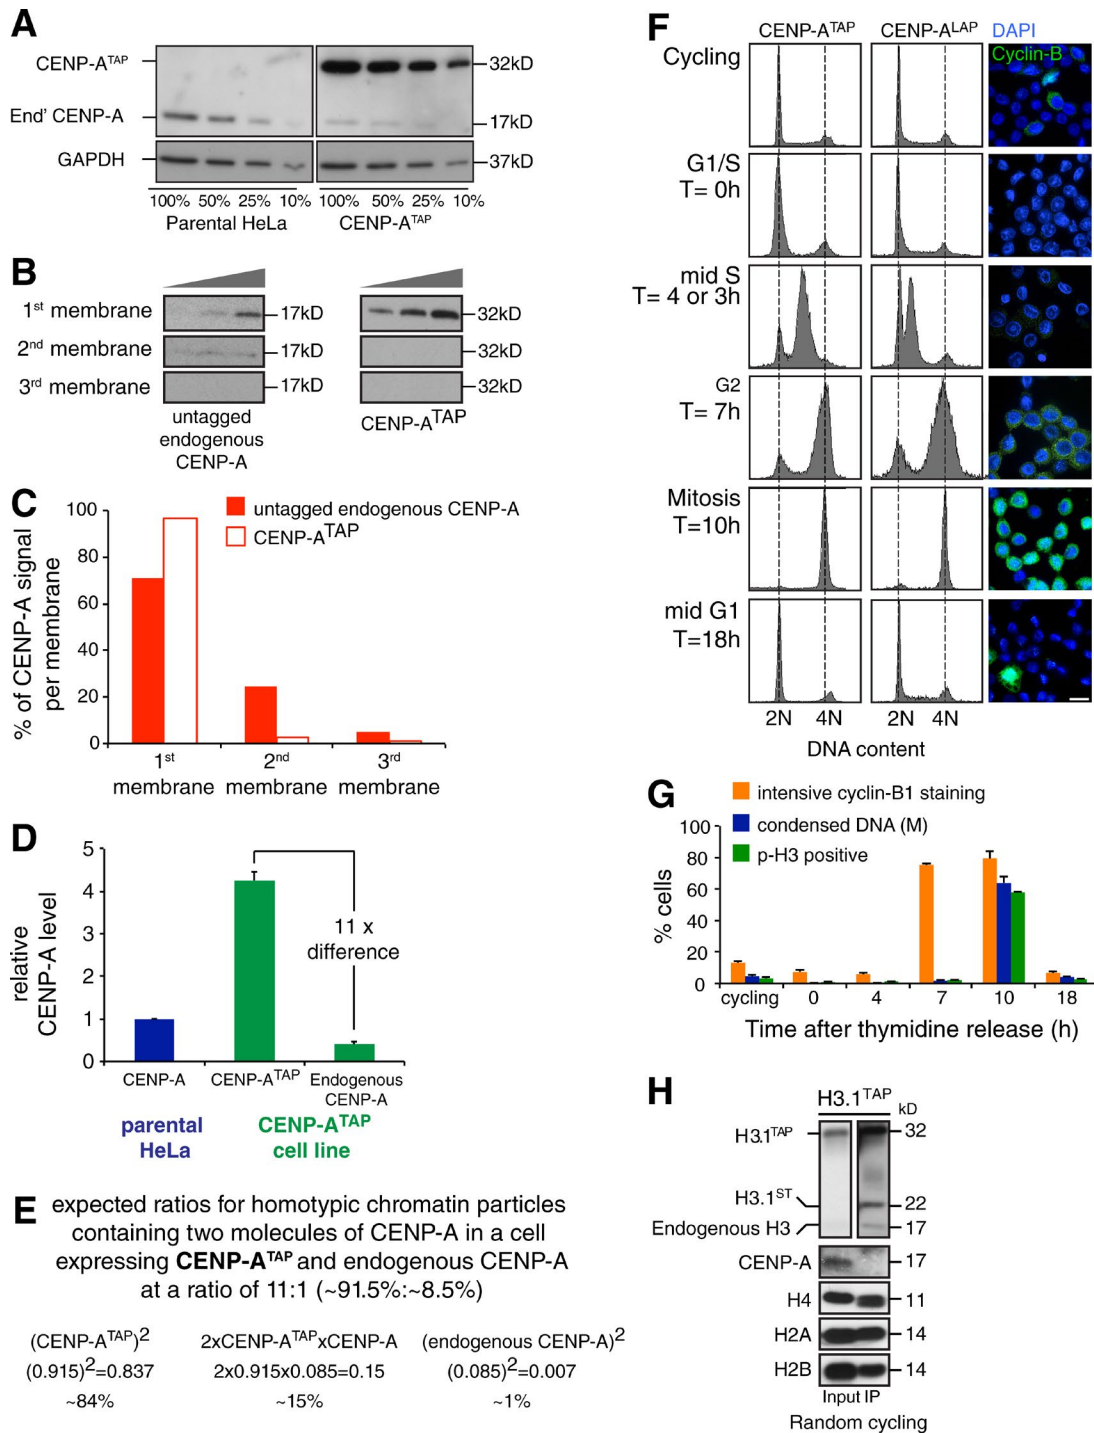

Figure S2. **Characterization of CENP-A<sup>TAP</sup> cells and synchronization efficiency for producing CENP-A chromatin at multiple cell cycle points.** (A) Immunoblot for CENP-A in whole-cell extracts of a parental HeLa cell line and a CENP-A<sup>TAP</sup>-expressing cell line. (B) Serial 1:2 dilutions of whole-cell extracts of CENP-A<sup>TAP</sup>-expressing cells, immunoblotted for CENP-A, after protein transfer onto a stack of three membranes. (C) Quantification of the fraction of CENP-A retained on the first membrane (compared with the total signal from all three membranes) shown in B. (D) Quantification of CENP-A expression levels (tagged and endogenous) shown in A after correcting for the fraction of CENP-A that passes through the immunoblot membrane (as shown in B and C).  $n = 4$  from four independent loadings in the gel shown in A. Error bars represent SEM. (E) Calculation of the expected ratios of homotypic chromatin particles containing two molecules of CENP-A in a cell expressing CENP-A<sup>TAP</sup> and endogenous CENP-A at a ratio of 11:1, respectively. (F) Synchronization efficiency of CENP-A<sup>TAP</sup> and CENP-A<sup>ALAP</sup> cells monitored by FACS analysis of DNA content and cyclin B immunofluorescence. Bar, 20  $\mu\text{m}$ . (G) Quantification of cyclin B immunofluorescence, p-H3-positive cells, and cells with condensed DNA at different time points after the release of CENP-A<sup>TAP</sup> cells from a second thymidine block (G1/S point).  $n = 6$  from six independent experiments. Error bars represent SEM. (H) Affinity purification of H3.1<sup>TAP</sup> results in coimmunoprecipitation of endogenous H3, H4, H2A, and H2B. CENP-A is not present within the H3.1<sup>TAP</sup> mononucleosomes.

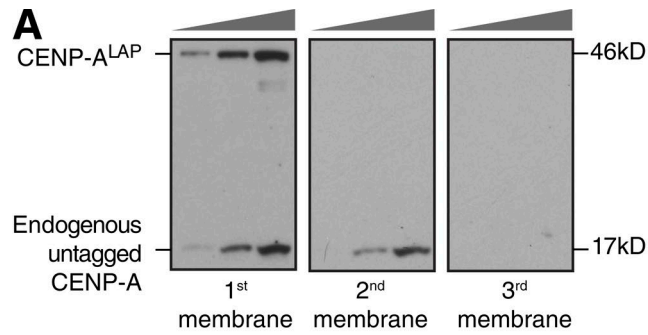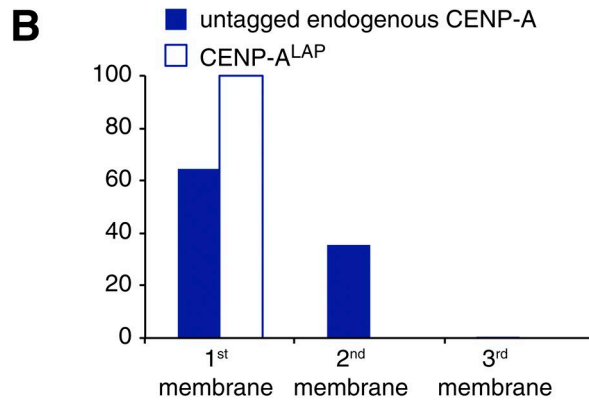

**C** expected ratios for homotypic chromatin particles containing two molecules of CENP-A in a cell expressing endogenously tagged **CENP-A<sup>LAP</sup>** and non-tagged CENP-A at a ratio of 1:1

| (CENP-A <sup>LAP</sup> ) <sup>2</sup> | 2xCENP-A <sup>LAP</sup> xCENP-A | (Non tagged CENP-A) <sup>2</sup> |
|---------------------------------------|---------------------------------|----------------------------------|
| (0.5) <sup>2</sup> =0.25              | 2x0.5x0.5=0.5                   | (0.5) <sup>2</sup> =0.25         |
| 25%                                   | 50%                             | 25%                              |

Figure S3. **Transfer efficiency of untagged endogenous CENP-A and endogenously tagged CENP-A<sup>LAP</sup>.** (A) Serial 1:2 dilutions of whole-cell extracts of CENP-A<sup>LAP</sup>-expressing cells, immunoblotted for CENP-A, after protein transfer onto a stack of three membranes. (B) Quantification of the fraction of CENP-A retained on the first membrane (compared with the total signal from all three membranes) shown in A. (C) Calculation of the expected ratios of homotypic chromatin particles containing two molecules of CENP-A in the cell line CENP-A<sup>+/LAP</sup>, expressing CENP-A<sup>LAP</sup> and nontagged CENP-A at a ratio of 1:1 as shown in Fig. 4 (D and E).

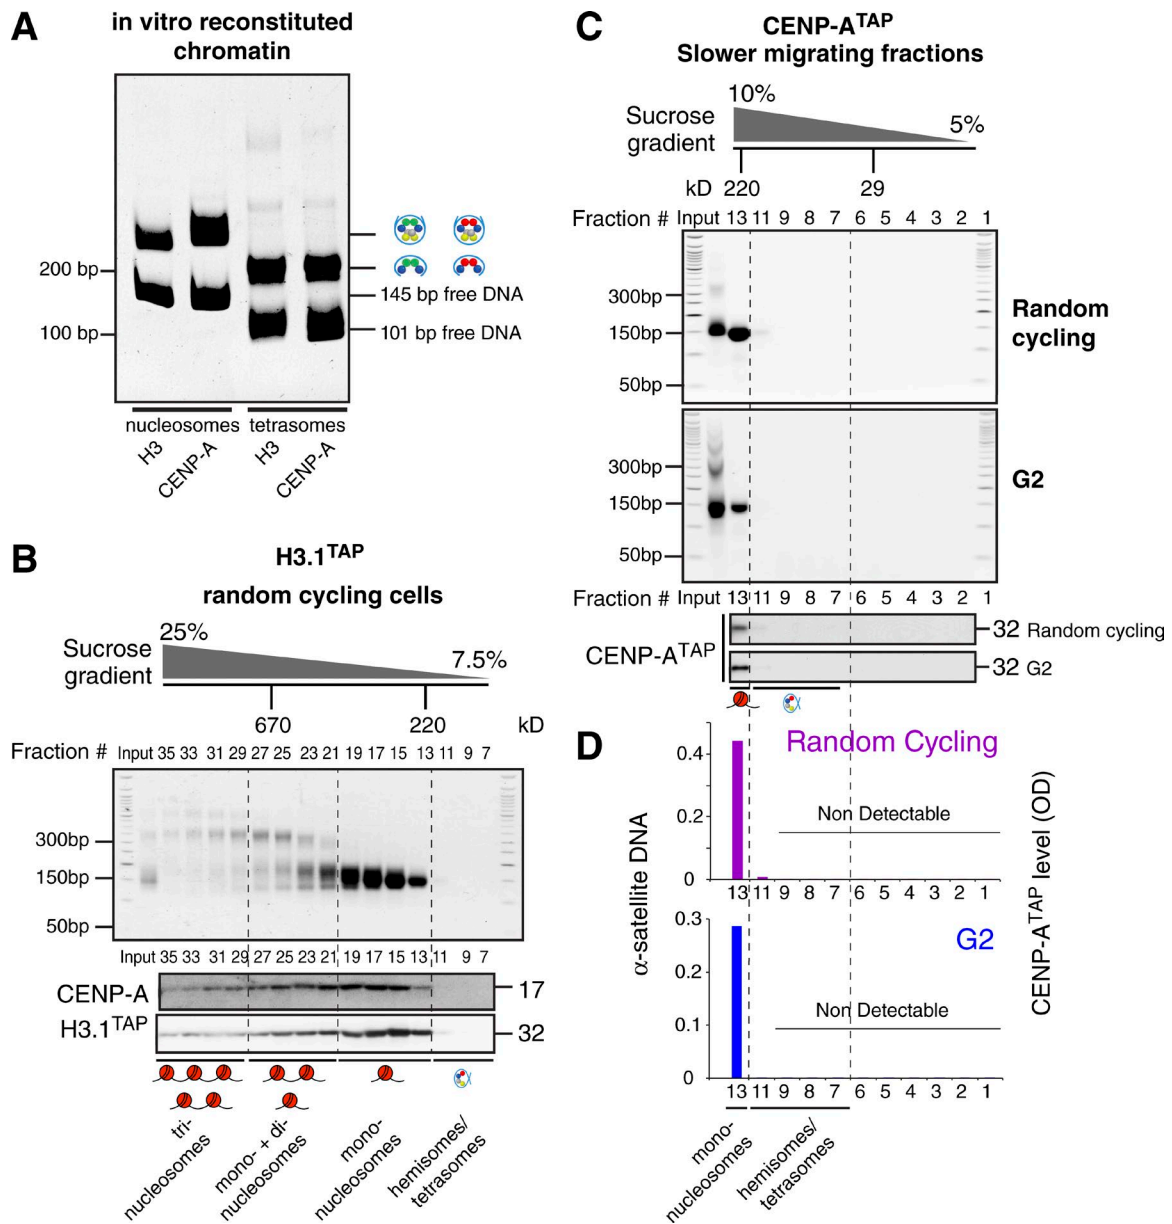

Figure S4. **Sedimentation of CENP-A is inconsistent with a hemisome/tetrasome structure as the major form of CENP-A chromatin.** (A) Ethidium bromide-stained 5% native PAGE of in vitro-reconstituted octameric H3 and CENP-A nucleosome wrapped with 145 bp of template DNA or (CENP-A/H4)<sub>2</sub> or (H3/H4)<sub>2</sub> tetrasomes wrapped with 101 bp of template DNA. (B) Sedimentation velocity of chromatin in random cycling H3.1<sup>TAP</sup> cells. (top) DNA length in the different fractions. (bottom) Immunoblotting for CENP-A and H3. (C, top) Ethidium bromide-stained agarose gel of DNA extracted from the slower-migrating chromatin fractions from randomly cycling or G2 CENP-A<sup>TAP</sup> cells. (bottom) Immunoblot for CENP-A. (D) Real-time quantitative PCR with primers for α-satellite DNA.

Table S1. Read statistics for ChIP-sequencing experiments

| Experiment                     | Replicate number | Total number of merged paired-end reads<br>(100 bp × 2) | Total number of merged reads<br>≥100 bp | Number of merged reads mapping<br>to α-satellites |
|--------------------------------|------------------|---------------------------------------------------------|-----------------------------------------|---------------------------------------------------|
|                                |                  |                                                         | %                                       | %                                                 |
| CENP-A <sup>TAP</sup> G1       | 1                | 30,632,549                                              | 29,112,562 (95%)                        | 12,716,461 (43.6%)                                |
|                                | 2                | 25,982,533                                              | 22,232,953 (85.5%)                      | 9,836,077 (44.2%)                                 |
| CENP-A <sup>TAP</sup> G2       | 1                | 24,210,941                                              | 21,834,136 (90.2%)                      | 11,929,448 (54.6%)                                |
|                                | 2                | 29,836,502                                              | 26,273,103 (88.1%)                      | 15,450,060 (58.9%)                                |
| H3.1 <sup>TAP</sup> RC         | 1                | 31,819,170                                              | 30,928,233 (97.2%)                      | 668,075 (2.1%)                                    |
|                                | 2                | 42,069,089                                              | 40,218,049 (95.6%)                      | 911,027 (2.2%)                                    |
| CENP-A <sup>TAP</sup> RC input | 1                | 61,557,119                                              | 61,434,004 (99.8%)                      | 1,374,644 (2.2%)                                  |

Total number of merged paired-end reads (one read per merged two paired ends) generated for each sample, the number (and percentage) of those that were ≥100 bp in length, and the number (and percentage) of reads mapping to α-satellites. RC, random cycling.

Table S2. ChIP sequencing combined replicate statistics

| Experiment               | Total number of merged paired-end reads<br>(100 bp × 2) | Total number of merged reads<br>≥100 bp | Number of merged reads mapping<br>to α-satellites |
|--------------------------|---------------------------------------------------------|-----------------------------------------|---------------------------------------------------|
|                          |                                                         | %                                       | %                                                 |
| CENP-A <sup>TAP</sup> G1 | 56,615,082                                              | 51,345,515 (90.7%)                      | 22,552,538 (43.9%)                                |
| CENP-A <sup>TAP</sup> G2 | 54,047,443                                              | 48,107,239 (89%)                        | 27,379,508 (56.8%)                                |
| H3.1 <sup>TAP</sup> RC   | 73,888,259                                              | 71,146,282 (96.3%)                      | 1,579,102 (2.15%)                                 |

Read statistics is given for the combined replicates in each condition. This table was used in Fig. 2 D.

Table S3. Human  $\alpha$ -satellite arrays in centromeric reference models

| hg38 chromosome number | Chromosome coordinates |                   | GenBank accession number | HuRef reference model length | Total array length | Total array length |
|------------------------|------------------------|-------------------|--------------------------|------------------------------|--------------------|--------------------|
|                        | Start                  | End               |                          |                              |                    |                    |
| chr1                   | 122,026,459            | 122,224,535       | GJ211836.1               | 198,076                      |                    |                    |
| chr1                   | 122,224,635            | 122,503,147       | GJ211837.1               | 278,512                      |                    |                    |
| chr1 <sup>a</sup>      | 122,503,247            | 124,785,432       | GJ212202.1               | 2,282,185                    |                    |                    |
| chr1                   | 124,785,532            | 124,849,129       | GJ211855.1               | 63,597                       |                    |                    |
| chr1                   | 124,849,229            | 124,932,724       | GJ211857.1               | 83,495                       |                    |                    |
| <b>chr1</b>            |                        |                   |                          |                              | <b>2,905,865</b>   | <b>2.9</b>         |
| <b>chr2</b>            | <b>92,188,145</b>      | <b>94,090,557</b> | GJ211860.1               | <b>1,902,412</b>             | <b>1,902,412</b>   | <b>1.9</b>         |
| chr3                   | 90,772,458             | 91,233,586        | GJ211866.1               | 461,128                      |                    |                    |
| chr3                   | 91,233,686             | 91,247,622        | GJ211867.1               | 13,936                       |                    |                    |
| chr3                   | 91,553,419             | 93,655,574        | GJ211871.1               | 2,102,155                    |                    |                    |
| <b>chr3</b>            |                        |                   |                          |                              | <b>2,577,219</b>   | <b>2.6</b>         |
| <b>chr4</b>            | <b>49,712,061</b>      | <b>51,743,951</b> | GJ211881.1               | <b>2,031,890</b>             | <b>2,031,890</b>   | <b>2.0</b>         |
| chr5                   | 46,485,900             | 46,569,062        | GJ211882.1               | 83,162                       |                    |                    |
| chr5                   | 46,569,162             | 46,796,725        | GJ211883.1               | 227,563                      |                    |                    |
| chr5                   | 46,796,825             | 47,061,288        | GJ211884.1               | 264,463                      |                    |                    |
| chr5                   | 47,106,994             | 47,153,339        | GJ211886.1               | 46,345                       |                    |                    |
| chr5                   | 47,153,439             | 47,296,069        | GJ211887.1               | 142,630                      |                    |                    |
| chr5 <sup>a</sup>      | 47,309,184             | 49,591,369        | GJ212203.1               | 2,282,185                    |                    |                    |
| chr5 <sup>b</sup>      | 49,667,531             | 49,721,203        | GJ211904.2               | 53,672                       |                    |                    |
| chr5                   | 49,721,303             | 50,059,807        | GJ211906.2               | 338,504                      |                    |                    |
| <b>chr5</b>            |                        |                   |                          |                              | <b>3,438,524</b>   | <b>3.4</b>         |
| <b>chr6</b>            | <b>58,553,888</b>      | <b>59,829,934</b> | GJ211907.1               | <b>1,276,046</b>             | <b>1,276,046</b>   | <b>1.3</b>         |
| chr7                   | 58,169,653             | 60,828,234        | GJ211908.1               | 2,658,581                    |                    |                    |
| chr7                   | 61,377,788             | 61,528,020        | GJ212194.1               | 150,232                      |                    |                    |
| chr7                   |                        |                   |                          |                              | 2,808,813          | 2.8                |
| chr8                   | 44,033,744             | 45,877,265        | GJ211909.1               | 1,843,521                    | 1,843,521          | 1.8                |
| chr9                   | 43,389,635             | 45,518,558        | GJ211929.1               | 2,128,923                    | 2,128,923          | 2.1                |
| chr10                  | 39,686,682             | 39,935,900        | GJ211930.1               | 249,218                      |                    |                    |
| chr10                  | 39,936,000             | 41,497,440        | GJ211932.1               | 1,561,440                    |                    |                    |
| chr10                  | 41,497,540             | 41,545,720        | GJ211933.1               | 48,180                       |                    |                    |
| chr10                  | 41,545,820             | 41,593,521        | GJ211936.1               | 47,701                       |                    |                    |
| <b>chr10</b>           |                        |                   |                          |                              | <b>1,906,539</b>   | <b>1.9</b>         |
| chr11                  | 51,078,348             | 51,090,317        | GJ211938.1               | 11,969                       |                    |                    |
| chr11                  | 51,090,417             | 54,342,399        | GJ211943.1               | 3,251,982                    |                    |                    |
| chr11                  | 54,342,499             | 54,425,074        | GJ211948.1               | 82,575                       | 3,346,526          | 3.3                |
| <b>chr11</b>           |                        |                   |                          |                              | <b>3,346,526</b>   | <b>3.3</b>         |
| chr12                  | 34,769,407             | 34,816,611        | GJ211949.1               | 47,204                       |                    |                    |
| chr12                  | 34,835,295             | 37,185,252        | GJ211954.1               | 2,349,957                    |                    |                    |
| <b>chr12</b>           |                        |                   |                          |                              | <b>2,397,161</b>   | <b>2.4</b>         |
| chr13 <sup>c</sup>     | 16,000,000             | 16,022,537        | GJ211955.2               | 22,537                       |                    |                    |
| chr13 <sup>c</sup>     | 16,022,637             | 16,110,659        | GJ211961.2               | 88,022                       |                    |                    |
| chr13 <sup>c</sup>     | 16,110,759             | 16,164,892        | GJ211962.2               | 54,133                       |                    |                    |
| chr13 <sup>c</sup>     | 16,164,992             | 16,228,527        | GJ211963.2               | 63,535                       |                    |                    |
| chr13 <sup>c</sup>     | 16,228,627             | 16,249,297        | GJ211965.2               | 20,670                       |                    |                    |
| chr13 <sup>c</sup>     | 16,249,397             | 16,256,067        | GJ211967.2               | 6,670                        |                    |                    |
| chr13 <sup>c</sup>     | 16,256,167             | 16,259,412        | GJ211968.2               | 3,245                        |                    |                    |
| chr13 <sup>c</sup>     | 16,259,512             | 16,282,073        | GJ211969.2               | 22,561                       |                    |                    |
| chr13 <sup>c</sup>     | 16,282,173             | 17,416,384        | GJ211972.2               | 1,134,211                    |                    |                    |
| chr13 <sup>c</sup>     | 17,416,484             | 17,416,824        | GJ212205.1               | 340                          |                    |                    |
| chr13 <sup>c</sup>     | 17,416,924             | 17,417,264        | GJ212206.1               | 340                          |                    |                    |
| chr13 <sup>c</sup>     | 17,417,364             | 17,418,562        | GJ211986.2               | 1,198                        |                    |                    |
| chr13 <sup>c</sup>     | 17,418,662             | 18,051,248        | GJ211991.2               | 632,586                      |                    |                    |
| <b>chr13</b>           |                        |                   |                          |                              | <b>2,050,048</b>   | <b>2.1</b>         |
| chr14 <sup>c</sup>     | 16,000,000             | 16,022,537        | GJ211992.2               | 22,537                       |                    |                    |
| chr14 <sup>c</sup>     | 16,140,627             | 16,228,649        | GJ211998.2               | 88,022                       |                    |                    |
| chr14 <sup>c</sup>     | 16,228,749             | 16,282,882        | GJ211999.2               | 54,133                       |                    |                    |
| chr14 <sup>c</sup>     | 16,282,982             | 16,346,517        | GJ212000.2               | 63,535                       |                    |                    |
| chr14 <sup>c</sup>     | 16,346,617             | 16,367,287        | GJ212002.2               | 20,670                       |                    |                    |

Table S3. Human  $\alpha$ -satellite arrays in centromeric reference models (Continued)

| hg38 chromosome number | Chromosome coordinates |            | GenBank accession number | HuRef reference model length | Total array length | Total array length |
|------------------------|------------------------|------------|--------------------------|------------------------------|--------------------|--------------------|
|                        | Start                  | End        |                          |                              |                    |                    |
| chr14 <sup>c</sup>     | 16,367,387             | 16,374,057 | GJ212004.2               | 6,670                        |                    |                    |
| chr14 <sup>c</sup>     | 16,374,157             | 16,377,402 | GJ212005.2               | 3,245                        |                    |                    |
| chr14 <sup>c</sup>     | 16,377,502             | 16,400,063 | GJ212006.2               | 22,561                       |                    |                    |
| chr14 <sup>c</sup>     | 16,404,448             | 17,538,659 | GJ212009.2               | 1,134,211                    |                    |                    |
| chr14 <sup>c</sup>     | 17,538,759             | 17,539,099 | GJ212210.1               | 340                          |                    |                    |
| chr14 <sup>c</sup>     | 17,539,199             | 17,539,539 | GJ212211.1               | 340                          |                    |                    |
| chr14 <sup>c</sup>     | 17,539,639             | 17,540,837 | GJ212023.2               | 1,198                        |                    |                    |
| chr14 <sup>c</sup>     | 17,540,937             | 18,173,523 | GJ212028.2               | 632,586                      |                    |                    |
| <b>chr14</b>           |                        |            |                          |                              | <b>2,050,048</b>   | <b>2.1</b>         |
| chr15                  | 17,083,673             | 17,498,951 | GJ212036.1               | 415,278                      |                    |                    |
| chr15                  | 17,499,051             | 18,355,008 | GJ212042.1               | 855,957                      |                    |                    |
| chr15                  | 18,355,108             | 19,725,254 | GJ212045.1               | 1,370,146                    |                    |                    |
| <b>chr15</b>           |                        |            |                          |                              | <b>2,641,381</b>   | <b>2.6</b>         |
| chr16                  | 36,311,158             | 36,334,460 | GJ212046.1               | 23,302                       |                    |                    |
| chr16                  | 36,337,666             | 38,265,669 | GJ212051.1               | 1,928,003                    |                    |                    |
| <b>chr16</b>           |                        |            |                          |                              | <b>1,951,305</b>   | <b>2.0</b>         |
| chr17                  | 22,813,679             | 23,194,918 | GJ212053.1               | 381,239                      |                    |                    |
| chr17                  | 23,195,018             | 26,566,633 | GJ212054.1               | 3,371,615                    |                    |                    |
| chr17                  | 26,566,733             | 26,616,164 | GJ212055.1               | 49,431                       |                    |                    |
| <b>chr17</b>           |                        |            |                          |                              | <b>3,802,285</b>   | <b>3.8</b>         |
| chr18                  | 15,460,899             | 15,780,377 | GJ212060.1               | 319,478                      |                    |                    |
| chr18                  | 15,797,855             | 20,561,439 | GJ212062.1               | 4,763,584                    |                    |                    |
| chr18                  | 20,603,247             | 20,696,289 | GJ212066.1               | 93,042                       |                    |                    |
| chr18                  | 20,696,389             | 20,736,025 | GJ212067.1               | 39,636                       |                    |                    |
| chr18                  | 20,736,125             | 20,813,083 | GJ212069.1               | 76,958                       |                    |                    |
| chr18                  | 20,839,797             | 20,861,206 | GJ212071.1               | 21,409                       |                    |                    |
| <b>chr18</b>           |                        |            |                          |                              | <b>5,314,107</b>   | <b>5.3</b>         |
| chr19 <sup>b</sup>     | 24,498,980             | 24,552,652 | GJ212072.2               | 53,672                       |                    |                    |
| chr19                  | 24,552,752             | 24,891,256 | GJ212077.2               | 338,504                      |                    |                    |
| chr19 <sup>a</sup>     | 24,908,689             | 27,190,874 | GJ212201.1               | 2,282,185                    |                    |                    |
| <b>chr19</b>           |                        |            |                          |                              | <b>2,674,361</b>   | <b>2.7</b>         |
| chr20                  | 26,436,232             | 26,586,955 | GJ212091.1               | 150,723                      |                    |                    |
| chr20                  | 26,608,145             | 28,494,539 | GJ212093.1               | 1,886,394                    |                    |                    |
| chr20                  | 28,508,997             | 28,556,953 | GJ212095.1               | 47,956                       |                    |                    |
| chr20                  | 28,648,108             | 28,728,874 | GJ212105.1               | 80,766                       |                    |                    |
| chr20                  | 29,125,793             | 29,204,668 | GJ212107.1               | 78,875                       |                    |                    |
| chr20                  | 29,917,404             | 30,038,348 | GJ212117.1               | 120,944                      |                    |                    |
| <b>chr20</b>           |                        |            |                          |                              | <b>2,365,658</b>   | <b>2.4</b>         |
| chr21 <sup>c</sup>     | 10,864,560             | 10,887,097 | GJ212118.2               | 22,537                       |                    |                    |
| chr21 <sup>c</sup>     | 10,887,197             | 10,975,219 | GJ212124.2               | 88,022                       |                    |                    |
| chr21 <sup>c</sup>     | 10,975,319             | 11,029,452 | GJ212125.2               | 54,133                       |                    |                    |
| chr21 <sup>c</sup>     | 11,029,552             | 11,093,087 | GJ212126.2               | 63,535                       |                    |                    |
| chr21 <sup>c</sup>     | 11,093,187             | 11,113,857 | GJ212128.2               | 20,670                       |                    |                    |
| chr21 <sup>c</sup>     | 11,113,957             | 11,120,627 | GJ212130.2               | 6,670                        |                    |                    |
| chr21 <sup>c</sup>     | 11,120,727             | 11,123,972 | GJ212131.2               | 3,245                        |                    |                    |
| chr21 <sup>c</sup>     | 11,124,072             | 11,146,633 | GJ212132.2               | 22,561                       |                    |                    |
| chr21 <sup>c</sup>     | 11,146,733             | 12,280,944 | GJ212135.2               | 1,134,211                    |                    |                    |
| chr21 <sup>c</sup>     | 12,281,044             | 12,281,384 | GJ212204.1               | 340                          |                    |                    |
| chr21 <sup>c</sup>     | 12,281,484             | 12,281,824 | GJ212207.1               | 340                          |                    |                    |
| chr21 <sup>c</sup>     | 12,281,924             | 12,283,122 | GJ212149.2               | 1,198                        |                    |                    |
| chr21 <sup>c</sup>     | 12,283,222             | 12,915,808 | GJ212154.2               | 632,586                      |                    |                    |
| <b>chr21</b>           |                        |            |                          |                              | <b>2,050,048</b>   | <b>2.1</b>         |
| chr22 <sup>c</sup>     | 12,954,788             | 12,977,325 | GJ212155.2               | 22,537                       |                    |                    |
| chr22 <sup>c</sup>     | 13,021,422             | 13,109,444 | GJ212161.2               | 88,022                       |                    |                    |
| chr22 <sup>c</sup>     | 13,109,544             | 13,163,677 | GJ212162.2               | 54,133                       |                    |                    |
| chr22 <sup>c</sup>     | 13,163,777             | 13,227,312 | GJ212163.2               | 63,535                       |                    |                    |
| chr22 <sup>c</sup>     | 13,227,412             | 13,248,082 | GJ212165.2               | 20,670                       |                    |                    |
| chr22 <sup>c</sup>     | 13,248,182             | 13,254,852 | GJ212167.2               | 6,670                        |                    |                    |
| chr22 <sup>c</sup>     | 13,254,952             | 13,258,197 | GJ212168.2               | 3,245                        |                    |                    |

Table S3. Human  $\alpha$ -satellite arrays in centromeric reference models (Continued)

| hg38 chromosome number | Chromosome coordinates |                   | GenBank accession number | HuRef reference model length | Total array length | Total array length |
|------------------------|------------------------|-------------------|--------------------------|------------------------------|--------------------|--------------------|
|                        | Start                  | End               |                          |                              |                    |                    |
| chr22 <sup>c</sup>     | 13,258,297             | 13,280,858        | GJ212169.2               | 22,561                       |                    |                    |
| chr22 <sup>c</sup>     | 13,285,243             | 14,419,454        | GJ212172.2               | 1,134,211                    |                    |                    |
| chr22 <sup>c</sup>     | 14,419,554             | 14,419,894        | GJ212208.1               | 340                          |                    |                    |
| chr22 <sup>c</sup>     | 14,419,994             | 14,420,334        | GJ212209.1               | 340                          |                    |                    |
| chr22 <sup>c</sup>     | 14,420,434             | 14,421,632        | GJ212186.2               | 1,198                        |                    |                    |
| chr22 <sup>c</sup>     | 14,421,732             | 15,054,318        | GJ212191.2               | 632,586                      |                    |                    |
| <b>chr22</b>           |                        |                   |                          |                              | <b>2,050,048</b>   | <b>2.1</b>         |
| <b>chrX</b>            | <b>58,605,579</b>      | <b>62,412,542</b> | GJ212192.1               | <b>3,806,963</b>             | <b>3,806,963</b>   | <b>3.8</b>         |

Centromere reference models (unpublished data) were generated with methods as previously described (Miga et al., 2014). Length estimates are expected to be averaged across arrays from homologous chromosomes. Column 1, chromosome information; column 2, chromosome start position; column 3, chromosome end position; column 4, GenBank accession number; column 5, length of each reference model as represented in the human assembly; column 6, total array length (in base pairs); column 7, total array length (in megabases). Sequence coordinates refer to the human Genome Reference Consortium human genome (build 38) assembly.

<sup>a</sup>Three near-identical arrays on chromosomes 1, 5, and 19.

<sup>b</sup>Two near-identical arrays on chromosomes 5 and 19.

<sup>c</sup>Acrocentric near-identical arrays on chromosomes 13, 14, 21, and 22.

**Provided online is Table S4 as a PDF. It shows CENP-A<sup>TAP</sup> and H3.1<sup>TAP</sup> sequence mapping onto  $\alpha$ -satellite DNA in human centromere reference models for each autosome and the X chromosome.**

## Reference

Miga, K.H., Y. Newton, M. Jain, N. Altemose, H.F. Willard, and W.J. Kent. 2014. Centromere reference models for human chromosomes X and Y satellite arrays. *Genome Res.* 24:697–707. <http://dx.doi.org/10.1101/gr.159624.113>
