# Supplementary material for: Human centromeric CENP-A chromatin is a homotypic, octameric nucleosome at all cell cycle points
Source: PubMed Central journal article supplement — J Cell Biol. 2017 Mar 6;216(3):607–21. doi: 10.1083/jcb.201608083 (PMC5350519; doi:10.1083/jcb.201608083), 2017-03-06
Supplement: JCB_201608083_TableS4.pdf [file JCB_201608083_TableS4.pdf]

Table S4. CENP-A<sup>TAP</sup> and H3.1<sup>TAP</sup> sequence mapping onto  $\alpha$ -satellite DNAs in human centromere reference models for each autosome and the X chromosome

| hg38 chromosome number | Chromosome coordinates |                   | GenBank Accession number | HuRef reference model length (bp) | CENP-A <sup>TAP</sup> G1 |                    | CENP-A <sup>TAP</sup> G2 |                    | H3.1 <sup>TAP</sup> RC |                   |
|------------------------|------------------------|-------------------|--------------------------|-----------------------------------|--------------------------|--------------------|--------------------------|--------------------|------------------------|-------------------|
|                        | Start                  | End               |                          |                                   | reads                    | bp                 | reads                    | bp                 | reads                  | bp                |
| chr1                   | 122,026,459            | 122,224,535       | GJ211836.1               | 198,076                           | 1,461                    | 196,166            | 1,564                    | 207,416            | 597                    | 87,974            |
| chr1                   | 122,224,635            | 122,503,147       | GJ211837.1               | 278,512                           | 23,360                   | 3,045,996          | 30,786                   | 4,004,255          | 4,410                  | 646,038           |
| chr1*                  | 122,503,247            | 124,785,432       | GJ212202.1               | 2,282,185                         | 6,105,419                | 772,773,576        | 7,094,651                | 902,285,561        | 251,399                | 36,133,148        |
| chr1                   | 124,785,532            | 124,849,129       | GJ211855.1               | 63,597                            | 4,792                    | 647,360            | 5,953                    | 797,337            | 1,302                  | 192,880           |
| chr1                   | 124,849,229            | 124,932,724       | GJ211857.1               | 83,495                            | 14,642                   | 1,890,865          | 17,965                   | 2,321,981          | 1,736                  | 252,436           |
| <b>Sum chr1</b>        |                        |                   |                          | <b>2,905,865</b>                  | <b>6,149,674</b>         | <b>778,553,963</b> | <b>7,150,919</b>         | <b>909,616,550</b> | <b>259,444</b>         | <b>37,312,476</b> |
| <b>chr2</b>            | <b>92,188,145</b>      | <b>94,090,557</b> | <b>GJ211860.1</b>        | <b>1,902,412</b>                  | <b>1,114,799</b>         | <b>143,974,336</b> | <b>1,275,294</b>         | <b>164,799,540</b> | <b>20,700</b>          | <b>3,036,769</b>  |
| chr3                   | 90,772,458             | 91,233,586        | GJ211866.1               | 461,128                           | 10,584                   | 1,409,525          | 9,509                    | 1,264,645          | 5,167                  | 743,841           |
| chr3                   | 91,233,686             | 91,247,622        | GJ211867.1               | 13,936                            | 412                      | 54,717             | 352                      | 47,378             | 205                    | 29,556            |
| chr3                   | 91,553,419             | 93,655,574        | GJ211871.1               | 2,102,155                         | 1,163,381                | 144,645,366        | 1,325,682                | 166,520,218        | 94,142                 | 10,440,534        |
| <b>Sum chr3</b>        |                        |                   |                          | <b>2,577,219</b>                  | <b>1,174,377</b>         | <b>146,109,608</b> | <b>1,335,543</b>         | <b>167,832,241</b> | <b>99,514</b>          | <b>11,213,931</b> |
| <b>chr4</b>            | <b>49,712,061</b>      | <b>51,743,951</b> | <b>GJ211881.1</b>        | <b>2,031,890</b>                  | <b>1,233,349</b>         | <b>151,127,497</b> | <b>1,397,925</b>         | <b>173,214,791</b> | <b>40,774</b>          | <b>5,696,788</b>  |
| chr5                   | 46,485,900             | 46,569,062        | GJ211882.1               | 83,162                            | 4,815                    | 564,774            | 4,662                    | 548,882            | 1,221                  | 156,786           |
| chr5                   | 46,569,162             | 46,796,725        | GJ211883.1               | 227,563                           | 3,555                    | 440,833            | 3,646                    | 452,207            | 1,265                  | 175,064           |
| chr5                   | 46,796,825             | 47,061,288        | GJ211884.1               | 264,463                           | 9,805                    | 1,241,255          | 9,703                    | 1,233,959          | 3,159                  | 443,549           |
| chr5                   | 47,106,994             | 47,153,339        | GJ211886.1               | 46,345                            | 4,486                    | 566,664            | 4,424                    | 563,510            | 1,596                  | 226,729           |
| chr5                   | 47,153,439             | 47,296,069        | GJ211887.1               | 142,630                           | 3,515                    | 421,387            | 3,948                    | 471,147            | 691                    | 96,586            |
| chr5*                  | 47,309,184             | 49,591,369        | GJ212203.1               | 2,282,185                         | 6,105,419                | 772,773,576        | 7,094,651                | 902,285,561        | 251,399                | 36,133,148        |
| chr5**                 | 49,667,531             | 49,721,203        | GJ211904.2               | 53,672                            | 1,799                    | 233,706            | 1,543                    | 200,507            | 767                    | 108,463           |
| chr5                   | 49,721,303             | 50,059,807        | GJ211906.2               | 338,504                           | 5,566                    | 709,116            | 4,927                    | 629,878            | 2,452                  | 349,776           |
| <b>Sum chr5</b>        |                        |                   |                          | <b>3,438,524</b>                  | <b>6,138,960</b>         | <b>776,951,311</b> | <b>7,127,504</b>         | <b>906,385,651</b> | <b>262,550</b>         | <b>37,690,101</b> |
| <b>chr6</b>            | <b>58,553,888</b>      | <b>59,829,934</b> | <b>GJ211907.1</b>        | <b>1,276,046</b>                  | <b>2,228,578</b>         | <b>274,542,041</b> | <b>2,725,427</b>         | <b>339,244,461</b> | <b>67,157</b>          | <b>9,501,112</b>  |
| chr7                   | 58,169,653             | 60,828,234        | GJ211908.1               | 2,658,581                         | 1,890,684                | 234,734,200        | 2,299,673                | 288,818,995        | 41,138                 | 5,818,872         |
| chr7                   | 61,377,788             | 61,528,020        | GJ212194.1               | 150,232                           | 5,737                    | 709,234            | 6,011                    | 746,119            | 1,614                  | 222,269           |
| <b>Sum chr7</b>        |                        |                   |                          | <b>2,808,813</b>                  | <b>1,896,421</b>         | <b>235,443,434</b> | <b>2,305,684</b>         | <b>289,565,114</b> | <b>42,752</b>          | <b>6,041,141</b>  |
| <b>chr8</b>            | <b>44,033,744</b>      | <b>45,877,265</b> | <b>GJ211909.1</b>        | <b>1,843,521</b>                  | <b>1,624,244</b>         | <b>205,287,215</b> | <b>2,125,046</b>         | <b>270,873,431</b> | <b>37,388</b>          | <b>5,381,393</b>  |

|                  |                   |                   |                   |                  |                  |                    |                  |                      |                |                   |
|------------------|-------------------|-------------------|-------------------|------------------|------------------|--------------------|------------------|----------------------|----------------|-------------------|
| <b>chr9</b>      | <b>43,389,635</b> | <b>45,518,558</b> | <b>GJ211929.1</b> | <b>2,128,923</b> | <b>1,192,718</b> | <b>147,751,733</b> | <b>1,362,257</b> | <b>170,167,593</b>   | <b>25,606</b>  | <b>3,633,103</b>  |
| chr10            | 39,686,682        | 39,935,900        | GJ211930.1        | 249,218          | 331,795          | 42,608,708         | 403,073          | 51,829,873           | 995            | 138,151           |
| chr10            | 39,936,000        | 41,497,440        | GJ211932.1        | 1,561,440        | 698,728          | 90,628,464         | 824,279          | 106,941,290          | 21,122         | 3,074,660         |
| chr10            | 41,497,540        | 41,545,720        | GJ211933.1        | 48,180           | 26,210           | 3,413,679          | 31,164           | 4,053,709            | 2,159          | 311,149           |
| chr10            | 41,545,820        | 41,593,521        | GJ211936.1        | 47,701           | 110,704          | 14,207,639         | 141,299          | 18,114,124           | 2,731          | 393,671           |
| <b>Sum chr10</b> |                   |                   |                   | <b>1,906,539</b> | <b>1,167,437</b> | <b>150,858,490</b> | <b>1,399,815</b> | <b>180,938,996</b>   | <b>27,007</b>  | <b>3,917,631</b>  |
| chr11            | 51,078,348        | 51,090,317        | GJ211938.1        | 11,969           | 73               | 9,546              | 104              | 13,749               | 50             | 7,168             |
| chr11            | 51,090,417        | 54,342,399        | GJ211943.1        | 3,251,982        | 1,476,032        | 192,834,230        | 1,929,625        | 252,756,395          | 56,978         | 8,358,125         |
| chr11            | 54,342,499        | 54,425,074        | GJ211948.1        | 82,575           | 161,983          | 20,677,761         | 216,313          | 27,681,784           | 4,836          | 697,457           |
| <b>Sum chr11</b> |                   |                   |                   | <b>3,346,526</b> | <b>1,638,088</b> | <b>213,521,537</b> | <b>2,146,042</b> | <b>280,451,928</b>   | <b>61,864</b>  | <b>9,062,750</b>  |
| chr12            | 34,769,407        | 34,816,611        | GJ211949.1        | 47,204           | 1,697            | 220,834            | 2,114            | 272,027              | 496            | 71,353            |
| chr12            | 34,835,295        | 37,185,252        | GJ211954.1        | 2,349,957        | 2,749,051        | 353,719,505        | 3,214,234        | 413,551,083          | 92,425         | 13,446,813        |
| <b>Sum chr12</b> |                   |                   |                   | <b>2,397,161</b> | <b>2,750,748</b> | <b>353,940,339</b> | <b>3,216,348</b> | <b>413,823,110</b>   | <b>92,921</b>  | <b>13,518,166</b> |
| chr13***         | 16,000,000        | 16,022,537        | GJ211955.2        | 22,537           | 1,000            | 250,926            | 2,070            | 240,611              | 797            | 113,642           |
| chr13***         | 16,022,637        | 16,110,659        | GJ211961.2        | 88,022           | 1,125            | 303,218            | 2,449            | 273,296              | 893            | 126,055           |
| chr13***         | 16,110,759        | 16,164,892        | GJ211962.2        | 54,133           | 6,312            | 1,712,846          | 13,409           | 1,573,026            | 6,367          | 918,199           |
| chr13***         | 16,164,992        | 16,228,527        | GJ211963.2        | 63,535           | 3,147            | 829,391            | 6,524            | 758,925              | 2,836          | 388,560           |
| chr13***         | 16,228,627        | 16,249,297        | GJ211965.2        | 20,670           | 3,518            | 1,022,766          | 7,508            | 868,048              | 3,007          | 435,718           |
| chr13***         | 16,249,397        | 16,256,067        | GJ211967.2        | 6,670            | 3,571            | 938,762            | 7,461            | 899,828              | 2,975          | 428,703           |
| chr13***         | 16,256,167        | 16,259,412        | GJ211968.2        | 3,245            | 115              | 27,449             | 243              | 27,787               | 97             | 13,636            |
| chr13***         | 16,259,512        | 16,282,073        | GJ211969.2        | 22,561           | 626              | 166,478            | 1,305            | 153,843              | 451            | 65,214            |
| chr13***         | 16,282,173        | 17,416,384        | GJ211972.2        | 1,134,211        | 2,487,380        | 507,872,091        | 5,271,121        | 630,098,540          | 94,400         | 13,704,134        |
| chr13***         | 17,416,484        | 17,416,824        | GJ212205.1        | 340              | 8                | 935                | 20               | 2,293                | 0              | 0                 |
| chr13***         | 17,416,924        | 17,417,264        | GJ212206.1        | 340              | 21               | 3,539              | 41               | 5,882                | 1              | 183               |
| chr13***         | 17,417,364        | 17,418,562        | GJ211986.2        | 1,198            | 760              | 204,870            | 1,618            | 192,384              | 637            | 91,165            |
| chr13***         | 17,418,662        | 18,051,248        | GJ211991.2        | 632,586          | 1,572,599        | 327,344,781        | 3,335,707        | 403,695,005          | 43,652         | 6,344,923         |
| <b>Sum chr13</b> |                   |                   |                   | <b>2,050,048</b> | <b>4,080,182</b> | <b>840,678,052</b> | <b>8,649,476</b> | <b>1,038,789,468</b> | <b>156,113</b> | <b>22,630,132</b> |

|                  |            |            |            |                  |                  |                    |                  |                      |                |                   |
|------------------|------------|------------|------------|------------------|------------------|--------------------|------------------|----------------------|----------------|-------------------|
| chr14***         | 16,000,000 | 16,022,537 | GJ211992.2 | 22,537           | 1,000            | 250,926            | 2,070            | 240,611              | 797            | 113,642           |
| chr14***         | 16,140,627 | 16,228,649 | GJ211998.2 | 88,022           | 1,125            | 303,218            | 2,449            | 273,296              | 893            | 126,055           |
| chr14***         | 16,228,749 | 16,282,882 | GJ211999.2 | 54,133           | 6,312            | 1,712,846          | 13,409           | 1,573,026            | 6,367          | 918,199           |
| chr14***         | 16,282,982 | 16,346,517 | GJ212000.2 | 63,535           | 3,147            | 829,391            | 6,524            | 758,925              | 2,836          | 388,560           |
| chr14***         | 16,346,617 | 16,367,287 | GJ212002.2 | 20,670           | 3,518            | 1,022,766          | 7,508            | 868,048              | 3,007          | 435,718           |
| chr14***         | 16,367,387 | 16,374,057 | GJ212004.2 | 6,670            | 3,571            | 938,762            | 7,461            | 899,828              | 2,975          | 428,703           |
| chr14***         | 16,374,157 | 16,377,402 | GJ212005.2 | 3,245            | 115              | 27,449             | 243              | 27,787               | 97             | 13,636            |
| chr14***         | 16,377,502 | 16,400,063 | GJ212006.2 | 22,561           | 626              | 166,478            | 1,305            | 153,843              | 451            | 65,214            |
| chr14***         | 16,404,448 | 17,538,659 | GJ212009.2 | 1,134,211        | 2,487,380        | 507,872,091        | 5,271,121        | 630,098,540          | 94,400         | 13,704,134        |
| chr14***         | 17,538,759 | 17,539,099 | GJ212210.1 | 340              | 8                | 935                | 20               | 2,293                | 0              | 0                 |
| chr14***         | 17,539,199 | 17,539,539 | GJ212211.1 | 340              | 21               | 3,539              | 41               | 5,882                | 1              | 183               |
| chr14***         | 17,539,639 | 17,540,837 | GJ212023.2 | 1,198            | 760              | 204,870            | 1,618            | 192,384              | 637            | 91,165            |
| chr14***         | 17,540,937 | 18,173,523 | GJ212028.2 | 632,586          | 1,572,599        | 327,344,781        | 3,335,707        | 403,695,005          | 43,652         | 6,344,923         |
| <b>Sum chr14</b> |            |            |            | <b>2,050,048</b> | <b>4,080,182</b> | <b>840,678,052</b> | <b>8,649,476</b> | <b>1,038,789,468</b> | <b>156,113</b> | <b>22,630,132</b> |
| chr15            | 17,083,673 | 17,498,951 | GJ212036.1 | 415,278          | 7,253            | 969,682            | 7,469            | 994,275              | 2,616          | 380,692           |
| chr15            | 17,499,051 | 18,355,008 | GJ212042.1 | 855,957          | 33,063           | 4,389,529          | 39,351           | 5,196,438            | 8,654          | 1,259,441         |
| chr15            | 18,355,108 | 19,725,254 | GJ212045.1 | 1,370,146        | 1,901,942        | 245,093,841        | 2,297,489        | 296,436,842          | 23,967         | 3,460,063         |
| <b>Sum chr15</b> |            |            |            | <b>2,641,381</b> | <b>1,942,258</b> | <b>250,453,052</b> | <b>2,344,309</b> | <b>302,627,555</b>   | <b>35,237</b>  | <b>5,100,196</b>  |
| chr16            | 36,311,158 | 36,334,460 | GJ212046.1 | 23,302           | 1,052            | 138,509            | 1,186            | 155,577              | 262            | 37,717            |
| chr16            | 36,337,666 | 38,265,669 | GJ212051.1 | 1,928,003        | 1,364,770        | 177,007,725        | 1,662,383        | 215,520,357          | 33,302         | 4,860,437         |
| <b>Sum chr16</b> |            |            |            | <b>1,951,305</b> | <b>1,365,822</b> | <b>177,146,234</b> | <b>1,663,569</b> | <b>215,675,934</b>   | <b>33,564</b>  | <b>4,898,154</b>  |
| chr17            | 22,813,679 | 23,194,918 | GJ212053.1 | 381,239          | 131,078          | 17,144,482         | 163,528          | 21,424,575           | 7,138          | 1,045,717         |
| chr17            | 23,195,018 | 26,566,633 | GJ212054.1 | 3,371,615        | 1,175,357        | 149,015,569        | 1,570,089        | 199,125,688          | 30,175         | 4,276,747         |
| chr17            | 26,566,733 | 26,616,164 | GJ212055.1 | 49,431           | 260,307          | 34,317,742         | 334,081          | 44,133,348           | 7,764          | 1,145,164         |
| <b>Sum chr17</b> |            |            |            | <b>3,802,285</b> | <b>1,566,742</b> | <b>200,477,793</b> | <b>2,067,698</b> | <b>264,683,611</b>   | <b>45,077</b>  | <b>6,467,628</b>  |
| chr18            | 15,460,899 | 15,780,377 | GJ212060.1 | 319,478          | 39,230           | 5,098,489          | 49,169           | 6,356,770            | 5,562          | 808,354           |
| chr18            | 15,797,855 | 20,561,439 | GJ212062.1 | 4,763,584        | 806,190          | 105,354,159        | 954,066          | 124,696,905          | 23,253         | 3,377,317         |
| chr18            | 20,603,247 | 20,696,289 | GJ212066.1 | 93,042           | 5,616            | 736,749            | 6,487            | 844,777              | 1,351          | 195,531           |
| chr18            | 20,696,389 | 20,736,025 | GJ212067.1 | 39,636           | 1,129            | 146,130            | 1,257            | 163,045              | 237            | 34,042            |
| chr18            | 20,736,125 | 20,813,083 | GJ212069.1 | 76,958           | 1,786            | 232,850            | 2,177            | 282,722              | 311            | 45,337            |
| chr18            | 20,839,797 | 20,861,206 | GJ212071.1 | 21,409           | 266              | 33,935             | 301              | 38,480               | 60             | 8,390             |
| <b>Sum chr18</b> |            |            |            | <b>5,314,107</b> | <b>854,217</b>   | <b>111,602,312</b> | <b>1,013,457</b> | <b>132,382,699</b>   | <b>30,774</b>  | <b>4,468,971</b>  |

|                  |            |            |            |                  |                  |                    |                  |                      |                |                   |
|------------------|------------|------------|------------|------------------|------------------|--------------------|------------------|----------------------|----------------|-------------------|
| chr19**          | 24,498,980 | 24,552,652 | GJ212072.2 | 53,672           | 1,799            | 233,706            | 1,543            | 200,507              | 767            | 108,463           |
| chr19            | 24,552,752 | 24,891,256 | GJ212077.2 | 338,504          | 5,760            | 774,057            | 5,091            | 683,177              | 2,843          | 413,366           |
| chr19*           | 24,908,689 | 27,190,874 | GJ212201.1 | 2,282,185        | 6,105,419        | 772,773,576        | 7,094,651        | 902,285,561          | 251,399        | 36,133,148        |
| <b>Sum chr19</b> |            |            |            | <b>2,674,361</b> | <b>6,112,978</b> | <b>773,781,339</b> | <b>7,101,285</b> | <b>903,169,245</b>   | <b>255,009</b> | <b>36,654,977</b> |
| chr20            | 26,436,232 | 26,586,955 | GJ212091.1 | 150,723          | 17,666           | 2,297,742          | 21,441           | 2,779,583            | 3,694          | 544,832           |
| chr20            | 26,608,145 | 28,494,539 | GJ212093.1 | 1,886,394        | 1,028,819        | 134,137,851        | 1,327,549        | 173,241,417          | 20,219         | 2,955,762         |
| chr20            | 28,508,997 | 28,556,953 | GJ212095.1 | 47,956           | 10,395           | 1,361,132          | 10,378           | 1,346,938            | 3,262          | 474,587           |
| chr20            | 28,648,108 | 28,728,874 | GJ212105.1 | 80,766           | 1,315            | 176,013            | 1,185            | 158,311              | 647            | 92,644            |
| chr20            | 29,125,793 | 29,204,668 | GJ212107.1 | 78,875           | 739              | 96,683             | 590              | 76,896               | 376            | 52,678            |
| chr20            | 29,917,404 | 30,038,348 | GJ212117.1 | 120,944          | 986              | 131,855            | 887              | 117,505              | 414            | 59,632            |
| <b>Sum chr20</b> |            |            |            | <b>2,365,658</b> | <b>1,059,920</b> | <b>138,201,276</b> | <b>1,362,030</b> | <b>177,720,650</b>   | <b>28,612</b>  | <b>4,180,135</b>  |
| chr21***         | 10,864,560 | 10,887,097 | GJ212118.2 | 22,537           | 1,000            | 250,926            | 2,070            | 240,611              | 797            | 113,642           |
| chr21***         | 10,887,197 | 10,975,219 | GJ212124.2 | 88,022           | 1,125            | 303,218            | 2,449            | 273,296              | 893            | 126,055           |
| chr21***         | 10,975,319 | 11,029,452 | GJ212125.2 | 54,133           | 6,312            | 1,712,846          | 13,409           | 1,573,026            | 6,367          | 918,199           |
| chr21***         | 11,029,552 | 11,093,087 | GJ212126.2 | 63,535           | 3,147            | 829,391            | 6,524            | 758,925              | 2,836          | 388,560           |
| chr21***         | 11,093,187 | 11,113,857 | GJ212128.2 | 20,670           | 3,518            | 1,022,766          | 7,508            | 868,048              | 3,007          | 435,718           |
| chr21***         | 11,113,957 | 11,120,627 | GJ212130.2 | 6,670            | 3,571            | 938,762            | 7,461            | 899,828              | 2,975          | 428,703           |
| chr21***         | 11,120,727 | 11,123,972 | GJ212131.2 | 3,245            | 115              | 27,449             | 243              | 27,787               | 97             | 13,636            |
| chr21***         | 11,124,072 | 11,146,633 | GJ212132.2 | 22,561           | 626              | 166,478            | 1,305            | 153,843              | 451            | 65,214            |
| chr21***         | 11,146,733 | 12,280,944 | GJ212135.2 | 1,134,211        | 2,487,380        | 507,872,091        | 5,271,121        | 630,098,540          | 94,400         | 13,704,134        |
| chr21***         | 12,281,044 | 12,281,384 | GJ212204.1 | 340              | 8                | 935                | 20               | 2,293                | 0              | 0                 |
| chr21***         | 12,281,484 | 12,281,824 | GJ212207.1 | 340              | 21               | 3,539              | 41               | 5,882                | 1              | 183               |
| chr21***         | 12,281,924 | 12,283,122 | GJ212149.2 | 1,198            | 760              | 204,870            | 1,618            | 192,384              | 637            | 91,165            |
| chr21***         | 12,283,222 | 12,915,808 | GJ212154.2 | 632,586          | 1,572,599        | 327,344,781        | 3,335,707        | 403,695,005          | 43,652         | 6,344,923         |
| <b>Sum chr21</b> |            |            |            | <b>2,050,048</b> | <b>4,080,182</b> | <b>840,678,052</b> | <b>8,649,476</b> | <b>1,038,789,468</b> | <b>156,113</b> | <b>22,630,132</b> |
| chr22***         | 12,954,788 | 12,977,325 | GJ212155.2 | 22,537           | 1,000            | 250,926            | 2,070            | 240,611              | 797            | 113,642           |
| chr22***         | 13,021,422 | 13,109,444 | GJ212161.2 | 88,022           | 1,125            | 303,218            | 2,449            | 273,296              | 893            | 126,055           |
| chr22***         | 13,109,544 | 13,163,677 | GJ212162.2 | 54,133           | 6,312            | 1,712,846          | 13,409           | 1,573,026            | 6,367          | 918,199           |
| chr22***         | 13,163,777 | 13,227,312 | GJ212163.2 | 63,535           | 3,147            | 829,391            | 6,524            | 758,925              | 2,836          | 388,560           |
| chr22***         | 13,227,412 | 13,248,082 | GJ212165.2 | 20,670           | 3,518            | 1,022,766          | 7,508            | 868,048              | 3,007          | 435,718           |
| chr22***         | 13,248,182 | 13,254,852 | GJ212167.2 | 6,670            | 3,571            | 938,762            | 7,461            | 899,828              | 2,975          | 428,703           |
| chr22***         | 13,254,952 | 13,258,197 | GJ212168.2 | 3,245            | 115              | 27,449             | 243              | 27,787               | 97             | 13,636            |
| chr22***         | 13,258,297 | 13,280,858 | GJ212169.2 | 22,561           | 626              | 166,478            | 1,305            | 153,843              | 451            | 65,214            |

|                  |                   |                   |                   |                  |                  |                    |                  |                      |                |                   |
|------------------|-------------------|-------------------|-------------------|------------------|------------------|--------------------|------------------|----------------------|----------------|-------------------|
| chr22***         | 13,285,243        | 14,419,454        | GJ212172.2        | 1,134,211        | 2,487,380        | 507,872,091        | 5,271,121        | 630,098,540          | 94,400         | 13,704,134        |
| chr22***         | 14,419,554        | 14,419,894        | GJ212208.1        | 340              | 8                | 935                | 20               | 2,293                | 0              | 0                 |
| chr22***         | 14,419,994        | 14,420,334        | GJ212209.1        | 340              | 21               | 3,539              | 41               | 5,882                | 1              | 183               |
| chr22***         | 14,420,434        | 14,421,632        | GJ212186.2        | 1,198            | 760              | 204,870            | 1,618            | 192,384              | 637            | 91,165            |
| chr22***         | 14,421,732        | 15,054,318        | GJ212191.2        | 632,586          | 1,572,599        | 327,344,781        | 3,335,707        | 403,695,005          | 43,652         | 6,344,923         |
| <b>Sum chr22</b> |                   |                   |                   | <b>2,050,048</b> | <b>4,080,182</b> | <b>840,678,052</b> | <b>8,649,476</b> | <b>1,038,789,468</b> | <b>156,113</b> | <b>22,630,132</b> |
| <b>chrX</b>      | <b>58,605,579</b> | <b>62,412,542</b> | <b>GJ212192.1</b> | <b>3,806,963</b> | <b>1,314,380</b> | <b>163,946,028</b> | <b>1,670,542</b> | <b>210,615,299</b>   | <b>28,485</b>  | <b>4,075,538</b>  |

Column 1: chromosome information. Column 2: chromosome start position. Column 3: chromosome end position. Column 4: Genbank accession. Column 5: length in bp of each reference model as represented in the human assembly. Columns 6-11: list of mapping data (number of bases aligned and number of reads aligned) from each experimental ChIP-seq dataset to the  $\alpha$ -satellite reference models. A summary of the reads and bases is given for those chromosomes that have several  $\alpha$ -satellite reference models. Arrays that are identical between different chromosome locations are indicated as the following: \*, Sum of three near-identical arrays on chr1, 5, and 19; \*\*, Sum of two near-identical arrays on chr5 and 19; \*\*\*, Sum of acrocentric near-identical arrays on chr13, 14, 21, and 22). Centromere reference models are from K.H. Miga and W.J. Kent (unpublished data). Sequence coordinates refer to the human GRCh38 assembly.
